# Supplementary material
Source: Springer Nature journal article supplement (https://www.springermedizin.de/resource/supplementary/13012_2006_54_MOESM2_ESM.pdf/9629146)
Supplement: MOESM2 [file 9629146]

Potentially relevant articles identified and retrieved from electronic search (n=12089)

Potentially relevant articles identified from electronic search without duplicates (n=6292)

Potentially relevant articles after exclusion using given criteria (n=2117)

Search within the population of 2117

Articles retrieved (n=208)

Articles assessed for relevance to study (n=84)

Articles subjected to qualitative analysis (n=16)
